# Supplementary material for: Acetyl-L-carnitine ameliorates atherosclerosis in LDLR−/− mice by modulating cholesterol metabolism through SREBP2-dependent cholesterol biosynthesis
Source: Front Nutr. 2024 Dec 16;11:1509577. doi: 10.3389/fnut.2024.1509577 (PMC11684389; doi:10.3389/fnut.2024.1509577)
Supplement: Supplementary file 1 [file Table_1.xlsx]

## Sheet: Sheet1
anti-LDLR polyclonal antibody	abcam	ab30532
anti-HMGCR polyclonal antibody	Cohesion Biosciences, London, UK	CQA1064
anti-SREBP2 polyclonal antibody	Merck	MABS1988
anti-ABCG5 polyclonal antibody	Cohesion Biosciences, London, UK	CQA3730
anti-ABCG8 polyclonal antibody	Cohesion Biosciences, London, UK	CQA3731
anti-APOB polyclonal antibody	Cohesion Biosciences, London, UK	CQA2718
anti-β-actin monoclonal antibody	Proteintech , Wuhan, China	66009-1-Ig
